# Supplementary material
Source: HighWire-hosted journal article supplement (https://cmajopen.ca/highwire/filestream/81184/field_highwire_adjunct_files/1/2018-0068-original-submission.pdf)
Supplement: 2018-0068-original-submission.pdf [file 2018-0068-original-submission.pdf]

1  
2  
3  
4  
5  
6  
7  
8  
9  
10  
11  
12  
13  
14  
15  
16  
17  
18  
19  
20  
21  
22  
23  
24  
25  
26  
27  
28  
29  
30  
31  
32  
33  
34  
35  
36  
37  
38  
39  
40  
41  
42  
43  
44  
45  
46  
47  
48  
49  
50  
51  
52  
53  
54  
55  
56  
57  
58  
59  
60

1 **High acceptability, adherence and tolerability of HIV pre-exposure prophylaxis in a pilot**  
2 **demonstration project among Toronto gay and bisexual men**

3  
4 Darrell H.S. Tan<sup>1,2,3</sup>, Alexandre Schnubb<sup>1</sup>, James Lawless<sup>1</sup>, Leah Szadkowski,<sup>4</sup> Troy Grennan<sup>5,6</sup>,  
5 James Wilton<sup>7</sup>, Shawn Fowler<sup>8</sup>, Trevor A. Hart<sup>9,10</sup>, John Maxwell<sup>11</sup>, Janet M. Raboud<sup>3,10</sup>

- 6 1. Division of Infectious Diseases, St. Michael's Hospital
- 7 2. Department of Medicine, University of Toronto
- 8 3. Toronto General Hospital Research Institute, University Health Network
- 9 4. Biostatistics Research Unit, University Health Network
- 10 5. British Columbia Centre for Disease Control
- 11 6. Division of Infectious Diseases, University of British Columbia
- 12 7. Ontario HIV Treatment Network
- 13 8. Hassle Free Clinic
- 14 9. Department of Psychology, Ryerson University
- 15 10. Dalla Lana School of Public Health, University of Toronto
- 16 11. AIDS Committee of Toronto

17  
18 **Correspondence to:**

19 Darrell H. S. Tan MD FRCPC PhD  
20 Division of Infectious Diseases, St. Michael's Hospital  
21 30 Bond St, 4CC – Room 4-179  
22 Toronto, ON, M5B 1W8, Canada  
23 Phone: +1 416 864 5568, Fax: +1 416 864 5310

24  
25 **Declaration of competing interests:**

26 In the past 2 years, DHST's institution has received research support for investigator-initiated  
27 research studies from Gilead and Viiv Healthcare, and DHST has been a Site Principal  
28 Investigator for clinical trials sponsored by Glaxo Smith Kline. JR is a co-investigator on several  
29 projects with in-kind contributions or research support from Merck and Gilead Sciences. All  
30 other authors declare no competing interests.  
31

1  
2  
3 32 **ABSTRACT**  
4

5 33 **Background:** PrEP is highly efficacious at preventing HIV, but concerns persist about  
6  
7 34 adherence and sexual transmitted infections (STIs). We assessed PrEP acceptability, adherence,  
8  
9  
10 35 and clinical outcomes in a pilot demonstration project among Toronto gay, bisexual and other  
11  
12 36 men who have sex with men (gbMSM).  
13

14 37  
15  
16 38 **Methods:** HIV-uninfected adult gbMSM scoring  $\geq 10$  on a validated HIV risk score (HIRI-  
17  
18  
19 39 MSM) and reporting condomless receptive anal sex were sequentially enrolled into a one-year,  
20  
21 40 open-label clinical trial of daily oral tenofovir disoproxil fumarate/emtricitabine. Visits included  
22  
23 41 adherence assessments (four-day recall, pill count, dried blood spot analysis), questionnaires  
24  
25 42 about PrEP acceptability, and laboratory testing for HIV, STIs and creatinine.  
26  
27  
28 43

29  
30 44 **Results:** Of 86 men screened, 52 were enrolled. Participants were mostly White (73.1%), young  
31  
32 45 (median age 33, IQR=28,37), gay (94.2%) men. PrEP acceptability was high, with all  
33  
34 46 participants reporting their experience as “good” or “very good”. Median adherence was high at  
35  
36 47 100% (95%, 100%) by self-report and 96.9% (93.4%, 98.4%) by pill count. Dried blood spots  
37  
38 48 suggested doses were taken on 4-7 days/week at 88.7% of visits. No HIV seroconversions  
39  
40 49 occurred, but 48% of participants experienced  $\geq 1$  bacterial STI, with incidences per 100 person-  
41  
42 50 years of 32.8, 32.8, 8.2 and 8.2 for chlamydia, gonorrhea, syphilis and lymphogranuloma  
43  
44 51 venereum respectively. Estimated glomerular filtration rate declined by 0.22 ml/min/month.  
45  
46  
47  
48  
49  
50  
51  
52

1  
2  
3 53 **Interpretation:** PrEP was associated with high adherence and acceptability, and no HIV  
4  
5 54 infections in this demonstration project. Frequent STIs and subclinical effects on renal function  
6  
7  
8 55 reinforce the need for ongoing vigilance.  
9

10 56  
11  
12 57 **Trial registration:** NCT 02149888  
13

14 58

15 59 **KEYWORDS**

16  
17  
18  
19 60 HIV; pre-exposure prophylaxis; demonstration project; men who have sex with men; adherence;  
20  
21 61 sexually transmitted infections  
22  
23  
24 62

Confidential

## 63 **BACKGROUND**

64 Despite decades of traditional prevention efforts, Canada continues to see large numbers of new  
65 HIV diagnoses every year. A disproportionate burden occurs among gay, bisexual and other  
66 men who have sex with men (gbMSM), who make up 49.7% of prevalent infections and have a  
67 131-fold higher risk of incident HIV than other Canadian men.[1] Pre-exposure prophylaxis  
68 (PrEP) with daily oral tenofovir disoproxil fumarate/emtricitabine (TDF/FTC) is a biomedical  
69 HIV prevention approach that has been shown to be safe and efficacious in reducing HIV  
70 acquisition in randomized trials.[2-5] As the results of these studies became available, interest  
71 increasingly turned to evaluating PrEP rollout through ‘demonstration projects’, or clinical trials  
72 addressing implementation outcomes such as adherence and real-world effectiveness.[6-8]  
73 However, in surveys we conducted among men undergoing HIV testing,[9, 10] physicians,[11]  
74 staff from AIDS service organizations,[12] and pharmacists[13] across Canada, respondents  
75 expressed concerns that suboptimal PrEP adherence could drive the emergence of drug-resistant  
76 HIV, that PrEP could be associated with more sexually transmitted infections (STIs), and that  
77 healthy individuals could be unnecessarily exposed to drug toxicities, despite overall optimism  
78 about the potential to prevent new infections. Further, there was uncertainty about the  
79 acceptability of PrEP for at-risk populations, fuelled in part by reports that uptake in settings  
80 with greater PrEP availability was slower than expected.[14, 15]  
81  
82 To address these concerns and to inform the broader rollout of PrEP in Canada, we conducted a  
83 pilot PrEP demonstration project among gbMSM in Toronto. Our primary objective was to  
84 assess the acceptability of PrEP at the community and individual levels, by quantifying both the  
85 volume of referrals to the study and participants’ satisfaction with their experience on PrEP.

1  
2  
3 86 Secondary objectives included estimating PrEP adherence, and quantifying key clinical  
4  
5 87 outcomes including HIV seroconversion, bacterial STIs, and adverse events. We conceived the  
6  
7 88 trial as a pilot study because we planned to use the findings to inform the design and sample size  
8  
9 89 calculations for larger PrEP implementation studies in the future.  
10  
11  
12 90

## 13 14 91 **METHODS**

### 15 16 92 **Study design**

17  
18  
19 93 PREPARATORY-5 was a one-arm, open-label pilot demonstration project of daily PrEP among  
20  
21 94 Toronto gbMSM at high risk of sexually acquired HIV infection (NCT 02149888). Study staff  
22  
23 95 dispensed tenofovir disoproxil fumarate/emtricitabine 300/200 mg, one tablet orally once daily  
24  
25 96 over one year, during quarterly follow-up visits at a tertiary academic hospital in downtown  
26  
27 97 Toronto.  
28  
29  
30 98

### 31 32 99 **Participants**

33  
34  
35 100 We recruited participants through self-referrals and provider-referrals between October 16, 2014  
36  
37 101 and December 30, 2014, as previously described.[16] English-speaking gbMSM aged  $\geq 18$  years  
38  
39 102 were eligible if they tested non-reactive on a 4<sup>th</sup> generation HIV test (ARCHITECT HIV  
40  
41 103 antigen/antibody Combo Assay, Abbott Laboratories, Abbott Park, IL), had a creatinine  
42  
43 104 clearance  $\geq 60$  mL/min by the Modified Diet in Renal Disease (MDRD) formula, reported at least  
44  
45 105 one condomless receptive anal sex act over the preceding six months, and scored  $\geq 10$  on the HIV  
46  
47 106 Incidence Risk Index for MSM (HIRI-MSM),[17] a recommended cut-off for identifying  
48  
49 107 gbMSM PrEP candidates.[17]  
50  
51  
52 108

1  
2  
3 109 Exclusion criteria included symptoms or signs of HIV seroconversion, use of pre- or post-  
4  
5 110 exposure prophylaxis within the preceding three months, concomitant nephrotoxic or  
6  
7 111 immunomodulatory drugs, hepatitis B surface antigen positivity, high risk of osteoporosis,  
8  
9 112 enrollment in any other HIV prevention trial, or perceived inability to adhere with the study  
10  
11  
12 113 protocol.

13  
14 114

15  
16  
17 115 **Study procedures**

18  
19 116 Eligible men attended a baseline visit within two weeks, and follow-up visits at months 1, 3, 6, 9  
20  
21 117 and 12 thereafter. Each visit included assessment for adverse events, INSTI® HIV-1/HIV-2  
22  
23 118 rapid antibody testing (bioLytical® Laboratories, Richmond, BC),[18] 4<sup>th</sup> generation HIV  
24  
25 119 testing, complete blood count, creatinine, phosphate, syphilis serology, pill count, dried blood  
26  
27 120 spot (DBS) collection for measurement of intra-erythrocytic tenofovir diphosphate (TFV-DP)  
28  
29 121 levels[19] and drug dispensing. At all visits except month 1, participants also underwent a  
30  
31 122 urinalysis and screening for gonorrhea and chlamydia infections, using urine nucleic acid  
32  
33 123 amplification testing as well as pharyngeal and rectal swabs for culture. Data on incident STIs  
34  
35 124 diagnosed at other facilities were collected through clinical history-taking. Every visit included  
36  
37 125 personalized counseling on PrEP adherence and STI risk reduction. Electronic questionnaires at  
38  
39 126 each visit included assessments of PrEP acceptability and adherence (AIDS Clinical Trials  
40  
41 127 Group Adherence Questionnaire[20]). Participants received \$25 CAD per visit as compensation  
42  
43 128 for time. Each participant was also asked to attend a single adherence support session with an  
44  
45 129 experienced counsellor housed at a partner community-based organization, where one-on-one  
46  
47 130 counseling was provided based on a published PrEP adherence support intervention.[21]  
48  
49  
50  
51  
52  
53

54 131  
55  
56  
57  
58  
59  
60

## 132 **Outcome Measures and Analysis**

133 We summarized demographic and clinical characteristics of enrolled participants using  
134 descriptive statistics. To assess community-level interest in PrEP, we quantified the number of  
135 individual referrals received per unit time. To assess individual-level PrEP acceptability, we  
136 calculated each participant's response to the question, "Overall, how would you rate your  
137 experience on PrEP?", averaged over all available study visits, on a Likert Scale ranging from  
138 1="very bad" to 5="very good". The proportion of participants reporting 'good' overall PrEP  
139 acceptability was defined as the proportion with average scores of 4 or higher.

140  
141 We PrEP adherence using self-report, pill count and intra-erythrocytic TFV-DP levels on DBS  
142 analysis.[22] We used self-report data to calculate the proportion of doses taken over the  
143 preceding four days, and pill count data to estimate the total number of doses taken between  
144 successive study visits. We used DBS data to classify results into four categories of PrEP  
145 adherence: dosing 7 days/week, 4-6 days/week, 2-3 days/week or <2 days/week, corresponding  
146 to HIV risk reductions of 100%, 100% (95%CI=86, 100%), 84% (95%CI=-24, 99%) and 44%  
147 (95%CI=-31, 77%) respectively.[23]

148  
149 We tabulated incident HIV infections and STIs, converted into incidence rates per 100 person-  
150 years of follow-up (PYFU). We classified clinical adverse events according to the Division of  
151 AIDS Grading system[24] and tabulated these according to severity and investigator-assessed  
152 probability of association with study drug. We calculated creatinine clearance at each visit using  
153 the MDRD equation, and modelled the effect of time on eGFR using a linear mixed model with a  
154 random intercept and a fixed effect of continuous time.

1  
2  
3 155  
4  
5 156 All analyses were by intention-to-treat. Analyses were conducted using SAS version 9.4 (Cary,  
6  
7  
8 157 NC) and R version 3.4.1 (R Development Core Team, Vienna, Austria).  
9

10 158

11  
12 159 **Sample size considerations**

13  
14 160 The target sample size was 50 participants, based primarily on feasibility considerations. This  
15  
16  
17 161 sample size permitted estimation of the proportion of participants reporting high PrEP  
18  
19 162 acceptability, anticipated at 80-90%, with reasonable precision ( $\pm 10\%$ ).  
20

21 163

22  
23  
24 164 **Ethical approval**

25  
26 165 Ethics approval was provided by the Research Ethics Boards of St. Michael's Hospital, Ryerson  
27  
28 166 University, University Health Network and the University of Toronto. All participants provided  
29  
30  
31 167 written informed consent prior to any study activities.  
32

33 168

34  
35 169 **RESULTS**

36  
37 170 During the 75-day recruitment period, community-based organizations referred 115 individuals  
38  
39 171 to the study, and our electronic advertisements generated 1518 click-throughs. These referrals  
40  
41  
42 172 generated 165 unique inquiries about trial participation (2.2/day), suggesting substantial PrEP  
43  
44 173 interest in the local gbMSM community.  
45

46 174

47  
48  
49 175 Of 86 men screened for participation, 52 were eligible and enrolled into the study (Figure 1). Of  
50  
51 176 these, 43 (83%) were retained for the full one-year period, while one, two and six participants  
52  
53 177 left the study early at months 3, 6 and 9 respectively, producing 48.75 person-years of follow-up  
54  
55  
56  
57  
58  
59  
60



1  
2  
3 178 overall. Baseline characteristics were similar for the 43 retained participants and the nine who  
4  
5 179 left early (data not shown). Study visits were conducted between November 10, 2014 and June  
6  
7 180 28, 2016  
8  
9  
10 181  
11  
12 182 Enrolled participants were mostly gay-identified (94%), White (73%) men with an undergraduate  
13  
14 183 degree or higher (73%), and median (interquartile range, IQR) age was 33 (28, 37) years (Table  
15  
16 184 1). The median number of prescription medications taken was zero (0, 1), but the median  
17  
18 185 number of supplements taken was 1 (0, 3). Most (69%) had a prior history of  $\geq 1$  bacterial STI.  
19  
20 186 Over the preceding six months, the median number of sexual partners was 18 (12, 30.5), and the  
21  
22 187 median number of condomless receptive or insertive anal sex acts was 5 (2, 15) and 5 (2, 12.5)  
23  
24 188 respectively.  
25  
26  
27  
28  
29

30  
31 190 Individual-level PrEP acceptability was high. After averaging data for each participant over all  
32  
33 191 follow-up visits for which responses were available (five, four or three visits for 81%, 12% and  
34  
35 192 8% of participants, respectively), 100% of participants rated their experience on PrEP as '4'  
36  
37 193 ("good") or '5' ("very good"), and the median overall response was 4.8 (4.4, 5.0).  
38  
39

40 194  
41  
42 195 Overall PrEP adherence was high, whether assessed by self-report, pill count or DBS analysis  
43  
44 196 (Table 2). Median adherence was 100% (95%, 100%) by self-report, and 96.9% (93.4%, 98.4%)  
45  
46 197 by pill count. Quantification of intra-erythrocytic TFV-DP levels was consistent with PrEP  
47  
48 198 dosing on 7 days, 4-6 days, 2-3 days and  $< 2$  days per week at 50.6%, 36.8%, 9.7% and 2.8% of  
49  
50 199 all study visits, respectively. After removing month 1 data, since TFV-DP may not have reached  
51  
52  
53  
54  
55  
56  
57  
58  
59  
60

1  
2  
3 200 steady state inside red blood cells at this early time point,[22] these figures increased to 58.5%,  
4  
5 201 30.3%, 8.7% and 2.6% respectively.  
6

7 202  
8  
9  
10 203 There were no HIV seroconversions. However, the burden of bacterial STIs was high, with 40  
11  
12 204 confirmed infections occurring in 25 (48%) study participants. Most (60%) of these 25  
13  
14 205 individuals had a prior history of bacterial STI. Incident STIs included 16 chlamydia (32.8/100  
15  
16 206 PYFU, 95%CI=19.4-52.2/100 PYFU), 16 gonorrhea (32.8/100 PYFU, 95%CI=19.4-52.2/100  
17  
18 207 PYFU), 4 early syphilis (8.2/100 PYFU, 95%CI=2.6-19.8/100 PYFU) and 4 lymphogranuloma  
19  
20 208 venereum (8.2/100 PYFU, 95%CI=2.6-19.8/100 PYFU) infections. In addition, there were six  
21  
22 209 episodes of non-specific urethritis treated empirically with ceftriaxone and azithromycin at other  
23  
24 210 facilities, for which gonorrhea and chlamydia testing were reportedly negative.  
25  
26  
27  
28  
29

30  
31 212 Of 185 adverse events overall (Table 3), 37 (20%) were at least possibly related to study drug,  
32  
33 213 but all were either mild (81%), or moderate (19%) in severity, and none led to PrEP  
34  
35 214 discontinuation. The most common adverse events at least possibly related to study drug were  
36  
37 215 nausea, diarrhea and headache, occurring in 21%, 12% and 12% of study participants  
38  
39 216 respectively. The only serious adverse event was a hospitalization for severe but self-limited  
40  
41 217 colitis; the two other adverse events graded as severe included one episode each of  
42  
43 218 lymphogranuloma venereum and stress. All three severe events were deemed unrelated to study  
44  
45 219 drug.  
46  
47  
48

49 220  
50  
51 221 We observed one grade 2 and three grade 1 creatinine elevations, all of which resolved  
52  
53 222 spontaneously without interrupting PrEP use. Creatinine clearance appeared to change by -0.22  
54  
55  
56  
57  
58  
59  
60

1  
2  
3 223 (95%CI=-0.45, 0.01) ml/min per month of follow-up in a generalized linear mixed model but this  
4  
5 224 change was of borderline statistical significance (p=0.06).  
6  
7  
8 225

9  
10 226 **DISCUSSION**  
11

12 227 In this pilot demonstration project of daily oral TDF/FTC in Toronto gbMSM at elevated HIV  
13  
14 228 risk, we observed high PrEP interest at the community level, high acceptability at the individual  
15  
16 229 level, excellent study drug adherence, a favourable adverse event profile, and no HIV  
17  
18 230 seroconversions over 48.75 person-years of follow-up. The high PrEP adherence in this study is  
19  
20 231 important because adherence is the key predictor of PrEP effectiveness.[2, 23, 25] However,  
21  
22 232 bacterial STIs were common, as seen in other reports,[26, 27] and creatinine clearance appeared  
23  
24 233 to decline by 0.22 ml/min per month. Taken together, these findings confirm the feasibility of  
25  
26 234 using PrEP to decrease HIV infections in this population, while highlighting the need for  
27  
28 235 ongoing attention to STIs and subclinical drug toxicities.  
29  
30  
31  
32

33 236  
34  
35 237 Because our study lacked a comparison group, it is not possible to determine to what extent PrEP  
36  
37 238 was causally related to the high burden of STIs observed. Existing studies have had mixed  
38  
39 239 findings on this topic. A meta-analysis summarizing rates of STIs among cohorts of gbMSM  
40  
41 240 using versus not using PrEP found incidence rate ratios of 25.3, 11.2 and 44.6 for infection with  
42  
43 241 gonorrhea, chlamydia and syphilis respectively.[28] However, since bacterial STIs are also an  
44  
45 242 important marker of HIV risk, these results are heavily confounded by indication, and the high  
46  
47 243 STI incidence could alternatively signify that programs have been successful at linking PrEP to  
48  
49 244 those in greatest need. That 69% of our study participants had a prior bacterial STI at study  
50  
51 245 entry may further support this notion. High STI rates could also be partly attributable to  
52  
53  
54  
55  
56  
57  
58  
59  
60

1  
2  
3 246 increased STI screening in PrEP users. The PROUD study found that after adjustment for the  
4  
5 247 frequency of testing, the odds of any bacterial STI was similar to those not using PrEP (odds  
6  
7 248 ratio=1.07, 90%CI=0.78, 1.46).[27] In the context of continually increasing gonorrhea,  
9  
10 249 chlamydia and syphilis epidemics in Canada,[29] additional STI control strategies are urgently  
11  
12 250 needed.

13  
14 251  
15  
16  
17 252 Although concern about side effects has been reported as the most common reason for not  
18  
19 253 wanting to use PrEP in acceptability studies,[30, 31] adverse events in our cohort were minimal,  
20  
21 254 and generally restricted to mild gastrointestinal symptoms that resolved spontaneously. These  
22  
23 255 findings are consistent with a systematic review of PrEP clinical trials, in which the risk of  
24  
25 256 adverse events was similar to placebo (relative risk=1.01, 95%CI=0.99, 1.03).[32] However, we  
26  
27 257 did observe subclinical declines in renal function, at -0.22 ml/min per month, or -2.64 ml/min per  
28  
29 258 year. This is greater than the age-related decline in eGFR observed in cohorts of healthy adults,  
30  
31 259 estimated at roughly 0.75 to 0.97 ml/min/year.[33, 34] Our findings are consistent with those  
32  
33 260 from randomized trials, in which PrEP has been associated with decreases in eGFR that were  
34  
35 261 roughly 1 ml/min/year greater than placebo.[35-39] Importantly, findings from a cohort of 3924  
36  
37 262 individuals in East Africa have shown that PrEP-related changes in renal function are generally  
38  
39 263 reversible, with eGFR levels among PrEP users becoming comparable to placebo participants by  
40  
41 264 four weeks after drug discontinuation, and returning to >75% of baseline levels in over 96% of  
42  
43 265 PrEP users by eight weeks.[40] PrEP has also been associated with reversible decreases in  
44  
45 266 BMD.[36] Results from a bone substudy of this trial will be reported elsewhere.

46  
47  
48  
49  
50  
51 267  
52  
53  
54  
55  
56  
57  
58  
59  
60

1  
2  
3 268 Our study has several limitations that warrant consideration. First, our single-arm design  
4  
5 269 precluded the ability to compare results to non-PrEP using individuals, and our sample size in  
6  
7 270 this pilot study was modest. However, our purpose was to conduct descriptive analyses only, to  
8  
9  
10 271 inform the design of future studies. Second, several factors may have contributed to our  
11  
12 272 favourable adherence results. Most participants were already taking  $\geq 1$  health supplement at  
13  
14 273 study entry, suggesting considerable experience with regular pill-taking and high health-seeking  
15  
16 274 behaviour within the cohort, and our adherence support intervention may have further bolstered  
17  
18  
19 275 adherence. However, the one-time nature of that counseling session makes it unlikely that it  
20  
21 276 impacted adherence overall. Finally, because we recruited participants in a context where PrEP  
22  
23 277 was not widely available, our participants could be considered PrEP “early adopters” according  
24  
25  
26 278 to classical diffusion theory,[41] and thus may not represent the broader population of at-risk  
27  
28 279 gbMSM in Canada. Health Canada only granted regulatory approval for use of TDF/FTC as  
29  
30  
31 280 PrEP in February 2016, and public reimbursement only became available in Ontario in  
32  
33 281 September 2017.

34  
35 282  
36  
37 283 In conclusion, daily oral TDF/FTC as PrEP was associated with high adherence and  
38  
39 284 acceptability, and no HIV infections in this study. As Canada’s first demonstration project of  
40  
41  
42 285 this emerging HIV prevention intervention, our findings support the broader rollout of PrEP for  
43  
44 286 at-risk gbMSM in this country and similar industrialized settings. However, changes in sexual  
45  
46 287 behaviour, frequent STIs and subclinical effects on renal function reinforce the need for ongoing  
47  
48  
49 288 vigilance. It will be important to continually monitor these outcomes as public drug coverage  
50  
51 289 and community uptake increase, and as PrEP clinical practice guidelines[42] lead to greater  
52  
53 290 prescribing.

1  
2  
3 291 **ACKNOWLEDGEMENTS**  
4

5 292 This work was supported by grants from the Ontario HIV Treatment Network (OHTN) and the  
6  
7 293 Canadian Institutes of Health Research (CIHR). Study drug was provided by Gilead Sciences  
8  
9 294 Inc. Rapid HIV testing kits were provided by bioLytical Laboratories Inc. DHST is supported  
10  
11 295 by a New Investigator Award from the CIHR/OHTN, TAH is supported by an OHTN Applied  
12  
13 296 HIV Research Chair and JMR was supported by an OHTN Chair in Biostatistics. Funders had  
14  
15 297 no role in the study design, data collection, analysis, interpretation or manuscript-writing.  
16  
17  
18

19 298  
20  
21  
22  
23  
24  
25  
26  
27  
28  
29  
30  
31  
32  
33  
34  
35  
36  
37  
38  
39  
40  
41  
42  
43  
44  
45  
46  
47  
48  
49  
50  
51  
52  
53  
54  
55  
56  
57  
58  
59  
60

Confidential

299 **Table 1. Participant characteristics**

| Characteristic                                             | Value <sup>a</sup> |
|------------------------------------------------------------|--------------------|
| Age (years)                                                | 33 (28, 37)        |
| Race                                                       |                    |
| White                                                      | 38 (73.1)          |
| Asian                                                      | 4 (7.7)            |
| Latino                                                     | 3 (5.8)            |
| Middle Eastern                                             | 3 (5.8)            |
| Other <sup>b</sup>                                         | 4 (7.7)            |
| Sexual orientation                                         |                    |
| Gay                                                        | 49 (94.2)          |
| Bisexual <sup>c</sup>                                      | 3 (5.8)            |
| Education                                                  |                    |
| High school or Some postsecondary                          | 14 (26.9)          |
| Undergraduate                                              | 23 (44.2)          |
| Graduate                                                   | 15 (28.9)          |
| Annual income (\$CAD)                                      |                    |
| ≤\$20K                                                     | 9 (17.3)           |
| \$20-40K                                                   | 11 (21.2)          |
| \$40-60K                                                   | 14 (26.9)          |
| \$60-80K                                                   | 7 (13.5)           |
| \$80-100K                                                  | 5 (9.6)            |
| >\$100K                                                    | 6 (11.5)           |
| Number of prescription medications                         | 0 (0, 1)           |
| Number of supplements                                      | 1 (0, 3)           |
| Current smoking                                            | 13 (25)            |
| Previously STI diagnoses                                   |                    |
| Gonorrhea                                                  | 21 (40.4)          |
| Chlamydia                                                  | 24 (46.2)          |
| Syphilis                                                   | 10 (19.2)          |
| Any bacterial STI                                          | 36 (69.2)          |
| Baseline HIRI-MSM score                                    | 29 (22.5, 33)      |
| Baseline sexual behaviours, past 6 months                  |                    |
| Number of partners                                         | 18 (12, 30.5)      |
| Number of HIV-positive partners                            | 1 (0, 3)           |
| Condomless receptive anal sex (# times)                    | 5 (2, 15)          |
| Condomless receptive anal sex with HIV+ partners (# times) | 0 (0, 0)           |
| Condomless insertive anal sex (# times)                    | 5 (2, 12.5)        |
| Condomless insertive anal sex with HIV+ partners (# times) | 0 (0, 3)           |

300 <sup>a</sup> Values are frequencies (proportions) and median (interquartile range).

301 <sup>b</sup> Includes individuals who identified as mixed (n=2), Black (n=1) and First Nations (n=1)

302 <sup>c</sup> Includes one individual who identified as 'pansexual'

303 **Table 2. PrEP adherence by study visit and measurement technique**

| Month | N  | Self-reported<br>4-day recall | Pill count                    | TFV-DP levels <sup>a</sup>                   |                                                                   |                                        |                                         |                                    |
|-------|----|-------------------------------|-------------------------------|----------------------------------------------|-------------------------------------------------------------------|----------------------------------------|-----------------------------------------|------------------------------------|
|       |    | Median (IQR)<br>% doses taken | Median (IQR)<br>% doses taken | Median (IQR)<br>TFV-DP level<br>(fmol/punch) | Number (Proportion) of participants in each adherence<br>category |                                        |                                         |                                    |
|       |    |                               |                               |                                              | ≤349<br>fmol/punch<br>(≤2 days/wk)                                | 350-699<br>fmol/punch<br>(2-3 days/wk) | 700-1249<br>fmol/punch<br>(4-6 days/wk) | ≥1250<br>fmol/punch<br>(7 days/wk) |
| 1     | 52 | 100%<br>(100%, 100%)          | 100%<br>(96.4%, 100%)         | 930<br>(746.5, 1199)                         | 2 (3.9)                                                           | 7 (13.5)                               | 32 (61.5)                               | 11 (21.2)                          |
| 3     | 52 | 100%<br>(100%, 100%)          | 98.7%<br>(93.7%, 100%)        | 1341<br>(1062, 1555.5)                       | 0 (0)                                                             | 4 (7.7)                                | 18 (34.6)                               | 30 (57.7)                          |
| 6     | 51 | 100%<br>(100%, 100%)          | 98.9%<br>(92.9%, 100%)        | 1432<br>(1068, 1847)                         | 0 (0)                                                             | 4 (7.8)                                | 15 (29.4)                               | 32 (62.8)                          |
| 9     | 48 | 100%<br>(100%, 100%)          | 98.9%<br>(95.0%, 100%)        | 1392.5<br>(1141, 1662.5)                     | 1 (2.1)                                                           | 3 (6.3)                                | 11 (22.9)                               | 33 (68.8)                          |
| 12    | 42 | 100%<br>(95.0%, 100%)         | 98.0%<br>(90.1%, 100%)        | 1191.5<br>(777, 1527)                        | 2 (4.8)                                                           | 6 (14.3)                               | 15 (35.7)                               | 19 (45.2)                          |

304  
305 <sup>a</sup> TFV-DP levels of ≤349, 350-699, 700-1249 and ≥1250 fmol/punch correspond to PrEP dosing on ≤2, 2-3, 4-6 and 7 days per week,  
306 respectively.[23]



**Table 3. Adverse events**

|                                                                 | Number of participants (%) | Number of events (% of total) |
|-----------------------------------------------------------------|----------------------------|-------------------------------|
| Any adverse event                                               | 47 (90)                    | 185                           |
| Grade 1                                                         | 34 (65)                    | 144 (78)                      |
| Grade 2                                                         | 10 (19)                    | 38 (21)                       |
| Grade 3                                                         | 3 (6)                      | 3 (2)                         |
| Any serious adverse event                                       | 1 (2)                      | 1 (0.5)                       |
| Adverse events by relationship to study drug                    |                            |                               |
| Possibly                                                        | 14 (27)                    | 26 (14)                       |
| Probably                                                        | 9 (17)                     | 11 (6)                        |
| Adverse events at least possibly related to study drug, by type |                            |                               |
| Nausea                                                          | 11 (21)                    | 12 (7)                        |
| Diarrhea                                                        | 6 (12)                     | 6 (3)                         |
| Headache                                                        | 6 (12)                     | 6 (3)                         |
| Fatigue                                                         | 5 (10)                     | 5 (3)                         |
| Bloating                                                        | 2 (4)                      | 2 (1)                         |
| Vivid Dreams                                                    | 2 (4)                      | 2 (1)                         |
| Anorexia                                                        | 1 (2)                      | 1 (0.5)                       |
| Difficulty sleeping                                             | 1 (2)                      | 1 (0.5)                       |
| Flatulence                                                      | 1 (2)                      | 1 (0.5)                       |
| Itching                                                         | 1 (2)                      | 1 (0.5)                       |

**FIGURE TITLES****Figure 1. Participant flow diagram**

## REFERENCES

1. Yang Q, Ogunnaike-Cooke1 S, Yan P, Zhang F, Remis RS, Schanzer D, Halverson J, Archibald CP, Boodram C: **Comparison of HIV incidence rates among key populations in Canada, 2011**. In: *20th International AIDS Conference Abstract MOPE108: 2014; Melbourne, Australia*; 2014.
2. Grant RM, Lama JR, Anderson PL, McMahan V, Liu AY, Vargas L, Goicochea P, Casapia M, Guanira-Carranza JV, Ramirez-Cardich ME *et al*: **Preexposure chemoprophylaxis for HIV prevention in men who have sex with men**. *N Engl J Med* 2010, **363**(27):2587-2599.
3. Baeten JM, Donnell D, Ndase P, Mugo NR, Campbell JD, Wangisi J, Tappero JW, Bukusi EA, Cohen CR, Katabira E *et al*: **Antiretroviral prophylaxis for HIV prevention in heterosexual men and women**. *N Engl J Med* 2012, **367**(5):399-410.
4. Thigpen MC, Kebaabetswe PM, Paxton LA, Smith DK, Rose CE, Segolodi TM, Henderson FL, Pathak SR, Soud FA, Chillag KL *et al*: **Antiretroviral preexposure prophylaxis for heterosexual HIV transmission in Botswana**. *N Engl J Med* 2012, **367**(5):423-434.
5. Choopanya K, Martin M, Suntharasamai P, Sangkum U, Mock PA, Leethochawalit M, Chiamwongpaet S, Kitisin P, Natrujirote P, Kittimunkong S *et al*: **Antiretroviral prophylaxis for HIV infection in injecting drug users in Bangkok, Thailand (the Bangkok Tenofovir Study): a randomised, double-blind, placebo-controlled phase 3 trial**. *Lancet* 2013, **381**(9883):2083-2090.
6. **Guidance on pre-exposure oral prophylaxis (PrEP) for serodiscordant couples, men and transgender women who have sex with men at high risk of HIV: Recommendations for use in the context of demonstration projects**. In. Geneva: World Health Organization; 2012.
7. **PrEP: Roadmap to the real world. Establishing the real-world effectiveness of PrEP through demonstration projects**. In. San Francisco: Project Inform; 2011.
8. Cahill S: **Pre-exposure prophylaxis for HIV prevention: moving toward implementation**. In: *Policy Focus*. Second edition, July 2012 edn. Boston: The Fenway Institute; 2012.
9. Wilton J, Kain T, Fowler S, Hart TA, Grennan JT, Maxwell J, Tan DHS: **Use of an HIV risk screening tool to identify optimal candidates for PrEP scale-up among men who have sex with men in Toronto, Canada: Disconnect between objective and subjective HIV risk**. *JIAS (submitted)* 2015.
10. Leonardi M, Lee E, Tan DH: **Awareness of, usage of and willingness to use HIV pre-exposure prophylaxis among men in downtown Toronto, Canada**. *Int J STD AIDS* 2011, **22**(12):738-741.
11. Sharma M, Wilton J, Senn H, Fowler S, Tan DH: **Preparing for PrEP: perceptions and readiness of canadian physicians for the implementation of HIV pre-exposure prophylaxis**. *PLoS One* 2014, **9**(8):e105283. doi: 105210.101371/journal.pone.0105283. eCollection 0102014.
12. Senn H, Wilton J, Sharma M, Fowler S, Tan DH: **Knowledge of and Opinions on HIV Preexposure Prophylaxis Among Front-Line Service Providers at Canadian AIDS Service Organizations**. *AIDS Res Hum Retroviruses* 2013, **29**(9):1183-1189.

13. Yoong D, Naccarato M, Sharma M, Wilton J, Senn H, Tan DH: **Preparing for PrEP: Perceptions and Readiness of Canadian pharmacists for the implementation of HIV pre-exposure prophylaxis.** *Int J STD AIDS [in press]* 2015.
14. Caceres CF, O'Reilly KR, Mayer KH, Baggaley R: **PrEP implementation: moving from trials to policy and practice.** *J Int AIDS Soc* 2015, **18**(4 Suppl 3):20222. eCollection 22015.
15. Mayer KH, Hosek S, Cohen S, Liu A, Pickett J, Warren M, Krakower D, Grant R: **Antiretroviral pre-exposure prophylaxis implementation in the United States: a work in progress.** *J Int AIDS Soc* 2015, **18**(4 Suppl 3):19980. eCollection 12015.
16. Wilton J, Noor SW, Schnubb A, Lawless J, Hart TA, Grennan T, Fowler S, Maxwell J, Tan DHS: **High HIV risk and syndemic burden regardless of referral source among MSM screening for a PrEP demonstration project in Toronto, Canada.** *BMC Public Health* 2018, **18**(1):292. doi: 210.1186/s12889-12018-15180-12888.
17. Smith DK, Pals SL, Herbst JH, Shinde S, Carey JW: **Development of a clinical screening index predictive of incident HIV infection among men who have sex with men in the United States.** *J Acquir Immune Defic Syndr* 2012, **60**(4):421-427.
18. bioLytical: **INSTI HIV-1/HIV-2 Antibody test Package insert.** 2012.
19. Bushman LR, Kiser JJ, Rower JE, Klein B, Zheng JH, Ray ML, Anderson PL: **Determination of nucleoside analog mono-, di-, and tri-phosphates in cellular matrix by solid phase extraction and ultra-sensitive LC-MS/MS detection.** *J Pharm Biomed Anal* 2011, **56**(2):390-401.
20. Chesney MA, Ickovics JR, Chambers DB, Gifford AL, Neidig J, Zwickl B, Wu AW: **Self-reported adherence to antiretroviral medications among participants in HIV clinical trials: the AACTG adherence instruments. Patient Care Committee & Adherence Working Group of the Outcomes Committee of the Adult AIDS Clinical Trials Group (AACTG).** *AIDS Care* 2000, **12**(3):255-266.
21. Amico KR, McMahan V, Goicochea P, Vargas L, Marcus JL, Grant RM, Liu A: **Supporting study product use and accuracy in self-report in the iPrEx study: next step counseling and neutral assessment.** *AIDS Behav* 2012, **16**(5):1243-1259.
22. Castillo-Mancilla JR, Zheng JH, Rower JE, Meditz A, Gardner EM, Predhomme J, Fernandez C, Langness J, Kiser JJ, Bushman LR *et al*: **Tenofovir, emtricitabine, and tenofovir diphosphate in dried blood spots for determining recent and cumulative drug exposure.** *AIDS Res Hum Retroviruses* 2013, **29**(2):384-390. doi: 310.1089/AID.2012.0089. Epub 2012 Oct 1010.
23. Grant RM, Anderson PL, McMahan V, Liu A, Amico KR, Mehrotra M, Hosek S, Mosquera C, Casapia M, Montoya O *et al*: **Uptake of pre-exposure prophylaxis, sexual practices, and HIV incidence in men and transgender women who have sex with men: a cohort study.** *Lancet Infect Dis* 2014, **14**(9):820-829. doi: 810.1016/S1473-3099(1014)70847-70843. Epub 72014 Jul 70822.
24. **Division of AIDS Table for Grading the Severity of Adult and Pediatric Adverse Events Version 1.0, December, 2004; Clarification August 2009** [[http://rsc.tech-res.com/Document/safetyandpharmacovigilance/Table\\_for\\_Grading\\_Severity\\_of\\_Adult\\_Pediatric\\_Adverse\\_Events.pdf](http://rsc.tech-res.com/Document/safetyandpharmacovigilance/Table_for_Grading_Severity_of_Adult_Pediatric_Adverse_Events.pdf)]
25. Landovitz RJ: **Preexposure Prophylaxis For HIV Prevention: What We Know and What We Still Need to Know for Implementation.** *Top Antivir Med* 2015, **23**(2):85-90.

- 1  
2  
3 26. Liu AY, Cohen SE, Vittinghoff E, Anderson PL, Doblecki-Lewis S, Bacon O, Chege W,  
4 Postle BS, Matheson T, Amico KR *et al*: **Preexposure Prophylaxis for HIV Infection**  
5 **Integrated With Municipal- and Community-Based Sexual Health Services.** *JAMA*  
6 *Intern Med* 2016, **176**(1):75-84. doi: 10.1001/jamainternmed.2015.4683.
- 7  
8 27. McCormack S, Dunn DT, Desai M, Dolling DI, Gafos M, Gilson R, Sullivan AK, Clarke  
9 A, Reeves I, Schembri G *et al*: **Pre-exposure prophylaxis to prevent the acquisition of**  
10 **HIV-1 infection (PROUD): effectiveness results from the pilot phase of a pragmatic**  
11 **open-label randomised trial.** *Lancet* 2015, **9**(15):00056-00052.
- 12  
13 28. Kojima N, Davey DJ, Klausner JD: **Pre-exposure prophylaxis for HIV infection and**  
14 **new sexually transmitted infections among men who have sex with men.** *AIDS* 2016,  
15 **30**(14):2251-2252. doi: 2210.1097/QAD.0000000000001185.
- 16  
17 29. **Public Health Agency of Canada. Report on sexually transmitted infections in**  
18 **Canada: 2013-2014. Centre for Communicable Diseases and Infection Control,**  
19 **Infectious Disease Prevention and Control Branch, Public Health Agency of**  
20 **Canada.** In.; 2017.
- 21  
22 30. Wilton J, Kain T, Fowler S, Hart TA, Grennan T, Maxwell J, Tan DH: **Use of an HIV-**  
23 **risk screening tool to identify optimal candidates for PrEP scale-up among men who**  
24 **have sex with men in Toronto, Canada: disconnect between objective and subjective**  
25 **HIV risk.** *J Int AIDS Soc* 2016, **19**(1):20777. doi: 20710.27448/IAS.20719.20771.20777.  
eCollection 22016.
- 26  
27 31. Peng P, Su S, Fairley CK, Chu M, Jiang S, Zhuang X, Zhang L: **A Global Estimate of**  
28 **the Acceptability of Pre-exposure Prophylaxis for HIV Among Men Who have Sex**  
29 **with Men: A Systematic Review and Meta-analysis.** *AIDS Behav* 2017, **7**(10):017-  
30 1675.
- 31  
32 32. Fonner VA, Dalglish SL, Kennedy CE, Baggaley R, O'Reilly KR, Koechlin FM, Rodolph  
33 M, Hodges-Mameletzis I, Grant RM: **Effectiveness and safety of oral HIV**  
34 **preexposure prophylaxis for all populations.** *AIDS* 2016, **30**(12):1973-1983. doi:  
35 1910.1097/QAD.0000000000001145.
- 36  
37 33. Lindeman RD, Tobin J, Shock NW: **Longitudinal studies on the rate of decline in**  
38 **renal function with age.** *J Am Geriatr Soc* 1985, **33**(4):278-285.
- 39  
40 34. Cohen E, Nardi Y, Krause I, Goldberg E, Milo G, Garty M, Krause I: **A longitudinal**  
41 **assessment of the natural rate of decline in renal function with age.** *J Nephrol* 2014,  
42 **27**(6):635-641. doi: 610.1007/s40620-40014-40077-40629. Epub 42014 Mar 40619.
- 43  
44 35. Yacoub R, Nadkarni GN, Weikum D, Konstantinidis I, Boueilh A, Grant RM, Mugwanya  
45 KK, Baeten JM, Wyatt CM: **Elevations in Serum Creatinine With Tenofovir-Based**  
46 **HIV Pre-Exposure Prophylaxis: A Meta-Analysis of Randomized Placebo-**  
47 **Controlled Trials.** *J Acquir Immune Defic Syndr* 2016, **71**(4):e115-118.
- 48  
49 36. Mirembe BG, Kelly CW, Mgodi N, Greenspan S, Dai JY, Mayo A, Piper J, Akello CA,  
50 Kiweewa FM, Magure T *et al*: **Bone Mineral Density Changes Among Young,**  
51 **Healthy African Women Receiving Oral Tenofovir for HIV Preexposure**  
52 **Prophylaxis.** *J Acquir Immune Defic Syndr* 2016, **71**(3):287-294. doi:  
53 210.1097/QAI.0000000000000858.
- 54  
55 37. Solomon MM, Lama JR, Glidden DV, Mulligan K, McMahan V, Liu AY, Guanira JV,  
56 Veloso VG, Mayer KH, Chariyalertsak S *et al*: **Changes in renal function associated**  
57 **with oral emtricitabine/tenofovir disoproxil fumarate use for HIV pre-exposure**  
58 **prophylaxis.** *AIDS* 2014, **28**(6):851-859. doi: 810.1097/QAD.0000000000000156.
- 59  
60

- 1  
2  
3  
4  
5  
6  
7  
8  
9  
10  
11  
12  
13  
14  
15  
16  
17  
18  
19  
20  
21  
22  
23  
24  
25  
26  
27  
28  
29  
30  
31  
32  
33  
34  
35  
36  
37  
38  
39  
40  
41  
42  
43  
44  
45  
46  
47  
48  
49  
50  
51  
52  
53  
54  
55  
56  
57  
58  
59  
60
38. Martin M, Vanichseni S, Suntharasamai P, Sangkum U, Mock PA, Gvetadze RJ, Curlin ME, Leethochawalit M, Chiamwongpaet S, Cherdtrakulkiat T *et al*: **Renal function of participants in the Bangkok tenofovir study--Thailand, 2005-2012.** *Clin Infect Dis* 2014, **59**(5):716-724. doi: 710.1093/cid/ciu1355. Epub 2014 May 1014.
39. Mugwanya KK, Wyatt C, Celum C, Donnell D, Mugo NR, Tappero J, Kiarie J, Ronald A, Baeten JM: **Changes in glomerular kidney function among HIV-1-uninfected men and women receiving emtricitabine-tenofovir disoproxil fumarate preexposure prophylaxis: a randomized clinical trial.** *JAMA Intern Med* 2015, **175**(2):246-254. doi: 210.1001/jamainternmed.2014.6786.
40. Mugwanya KK, Wyatt C, Celum C, Donnell D, Kiarie J, Ronald A, Baeten JM: **Reversibility of Glomerular Renal Function Decline in HIV-Uninfected Men and Women Discontinuing Emtricitabine-Tenofovir Disoproxil Fumarate Pre-Exposure Prophylaxis.** *J Acquir Immune Defic Syndr* 2016, **71**(4):374-380. doi: 310.1097/QAI.0000000000000868.
41. Dearing JW, Kee KF: **Historical roots of dissemination and implementation science.** In: *Dissemination and Implementation Research in Health: Translating Science to Practice.* edn. Edited by Brownson RC, Colditz GA, Proctor EK. New York: Oxford University Press; 2012: 55-71.
42. Tan DHS, Hull MW, Yoong D, Tremblay C, O'Byrne P, Thomas R, Kille J, Baril JG, Cox J, Giguere P *et al*: **Canadian guideline on HIV pre-exposure prophylaxis and nonoccupational postexposure prophylaxis.** *CMAJ* 2017, **189**(47):E1448-E1458. doi: 1410.1503/cmaj.170494.

1  
2  
3  
4  
5  
6  
7  
8  
9  
10  
11  
12  
13  
14  
15  
16  
17  
18  
19  
20  
21  
22  
23  
24  
25  
26  
27  
28  
29  
30  
31  
32  
33  
34  
35  
36  
37  
38  
39  
40  
41  
42  
43  
44  
45  
46  
47  
48  
49  
50  
51  
52  
53  
54  
55  
56  
57  
58  
59  
60

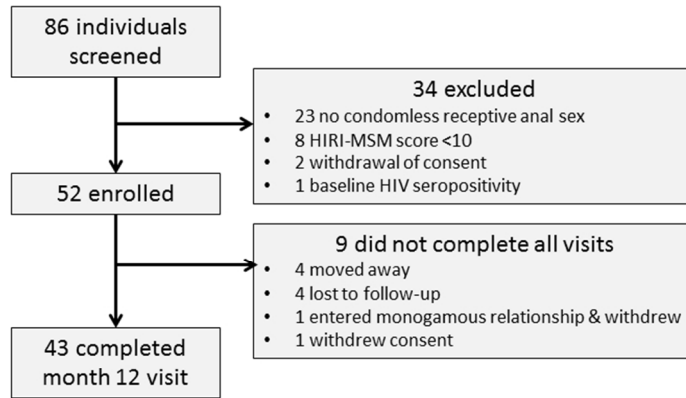

Participant flow diagram

254x190mm (96 x 96 DPI)
